# Supplementary material
Source: Springer Nature journal article supplement (https://springermedizin.de/resource/supplementary/12899_2008_121_MOESM6_ESM.pdf/9514962)

**A**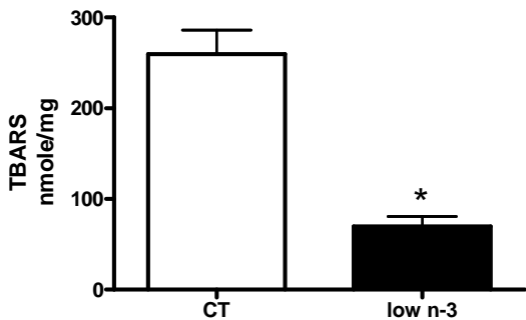**B**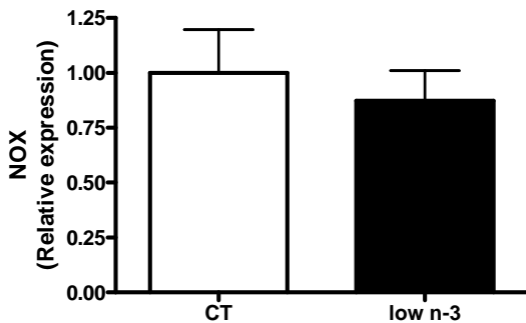

Supplement: MOESM6 [file 9514962]
